# Supplementary material
Source: publisher figshare collection journal article supplement (https://gsajournals.figshare.com/articles/dataset/_/22687252)

## ITS-only ASAP analysis:

Partition 1

Asap-Score: 1.000000

P-value: 2.814371e-01

Threshold distance: 1.32%

Nb subsets with recursion:18 (without recursion: 17)

Subset[ 1 ] n: 2 ;id: Exophiala\_viscosa\_JF\_03-4F Exophiala\_viscosa\_JF\_03-3F

Subset[ 2 ] n: 1 ;id: Exophiala\_nigra

Subset[ 3 ] n: 1 ;id: Exophiala\_spinifera

Subset[ 4 ] n: 1 ;id: Exophiala\_bergeri

Subset[ 5 ] n: 1 ;id: Exophiala\_dermatitidis

Subset[ 6 ] n: 2 ;id: Exophiala\_sideris Phaeoannellomyces\_elegans

Subset[ 7 ] n: 1 ;id: Exophiala\_lecanii-corni

Subset[ 8 ] n: 1 ;id: Exophiala\_cancearae

Subset[ 9 ] n: 1 ;id: Exophiala\_castellanii

Subset[ 10 ] n: 1 ;id: Exophiala\_crusticola

Subset[ 11 ] n: 1 ;id: Exophiala\_salmonis

Subset[ 12 ] n: 1 ;id: Exophiala\_nishimurae

Subset[ 13 ] n: 1 ;id: Exophiala\_pisciphila

Subset[ 14 ] n: 1 ;id: Exophiala\_aquamarina

Subset[ 15 ] n: 1 ;id: Exophiala\_xenobiotica

Subset[ 16 ] n: 1 ;id: Exophiala\_oligosperma

Subset[ 17 ] n: 1 ;id: Exophiala\_jeanselmei

Subset[ 18 ] n: 1 ;id: Endocarpon\_pusillum

| Nb of subsets | asap-score | P-val (rank)  | W (rank)      | Threshold dist. | Text                     |
|---------------|------------|---------------|---------------|-----------------|--------------------------|
| * 18          | 1.00       | 2.81e-01 (1)  | 9.71e-03 (1)  | 0.013177        | <a href="#">list csv</a> |
| 8             | 4.00       | 6.45e-01 (3)  | 5.90e-03 (5)  | 0.109561        | <a href="#">list csv</a> |
| * 16          | 4.00       | 9.12e-01 (4)  | 5.93e-03 (4)  | 0.041445        | <a href="#">list csv</a> |
| * 17          | 4.50       | 6.37e-01 (2)  | 5.27e-03 (7)  | 0.028664        | <a href="#">list csv</a> |
| 13            | 8.50       | 9.58e-01 (6)  | 2.90e-03 (11) | 0.066657        | <a href="#">list csv</a> |
| 11            | 8.50       | 9.62e-01 (7)  | 2.98e-03 (10) | 0.080038        | <a href="#">list csv</a> |
| 9             | 10.00      | 1.00e+00 (14) | 5.77e-03 (6)  | 0.100786        | <a href="#">list csv</a> |
| 7             | 10.50      | 9.64e-01 (8)  | 2.46e-03 (13) | 0.124177        | <a href="#">list csv</a> |
| 20            | 10.50      | 1.00e+00 (19) | 9.36e-03 (2)  | 0.000000        | <a href="#">list csv</a> |
| 19            | 10.50      | 1.00e+00 (18) | 8.31e-03 (3)  | 0.004722        | <a href="#">list csv</a> |

Histogram of distances [\[save\]](#)

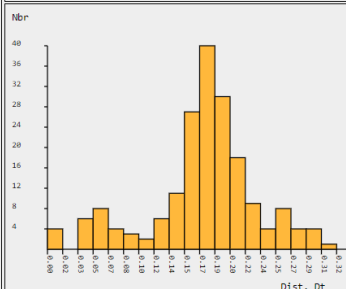

Ranked distances [\[save\]](#)

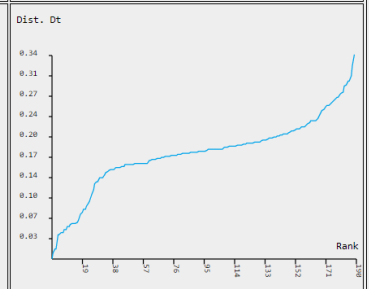

## 18S-28S-ITS concatenation ASAP analysis:

Partition 1

Asap-Score: 2.000000

P-value: 1.477046e-01

Threshold distance: 0.75%

Nb subsets with recursion:18 (without recursion: 17)

Subset[ 1 ] n: 2 ;id: Exophiala viscosa JF 03-3F Exophiala viscosa JF 03-4F

Subset[ 2 ] n: 1 ;id: Exophiala nigra

Subset[ 3 ] n: 2 ;id: Exophiala sideris Phaeoannellomyces elegans

Subset[ 4 ] n: 1 ;id: Exophiala bergeri

Subset[ 5 ] n: 1 ;id: Exophiala spinifera

Subset[ 6 ] n: 1 ;id: Exophiala aquamarina

Subset[ 7 ] n: 1 ;id: Exophiala cancerae

Subset[ 8 ] n: 1 ;id: Exophiala castellanii

Subset[ 9 ] n: 1 ;id: Exophiala dermatitidis

Subset[ 10 ] n: 1 ;id: Exophiala jeanselmei

Subset[ 11 ] n: 1 ;id: Exophiala lecanii-corni

Subset[ 12 ] n: 1 ;id: Exophiala nishimurae

Subset[ 13 ] n: 1 ;id: Exophiala oligosperma

Subset[ 14 ] n: 1 ;id: Exophiala pisciphila

Subset[ 15 ] n: 1 ;id: Exophiala salmonis

Subset[ 16 ] n: 1 ;id: Exophiala xenobiotica

Subset[ 17 ] n: 1 ;id: Exophiala crusticola

Subset[ 18 ] n: 1 ;id: Endocarpon pusillum

| Nb of subsets | asap-score |   | P-val (rank)  | W (rank)      | Threshold dist. | Text                     |
|---------------|------------|---|---------------|---------------|-----------------|--------------------------|
| * 18          | 2.00       | ● | 1.48e-01 (1)  | 2.89e-03 (3)  | 0.007509        | <a href="#">list csv</a> |
| * 11          | 4.00       | ● | 7.92e-01 (2)  | 1.91e-03 (6)  | 0.029425        | <a href="#">list csv</a> |
| 2             | 4.50       | ● | 9.30e-01 (5)  | 1.94e-03 (4)  | 0.069412        | <a href="#">list csv</a> |
| * 9           | 7.50       | ● | 9.76e-01 (7)  | 1.74e-03 (8)  | 0.030263        | <a href="#">list csv</a> |
| * 7           | 8.00       | ● | 9.74e-01 (6)  | 1.07e-03 (10) | 0.033474        | <a href="#">list csv</a> |
| * 16          | 8.50       | ● | 8.86e-01 (4)  | 7.46e-04 (13) | 0.011888        | <a href="#">list csv</a> |
| * 6           | 9.50       | ● | 8.80e-01 (3)  | 4.85e-04 (16) | 0.038156        | <a href="#">list csv</a> |
| 20            | 10.00      | ● | 1.00e+00 (19) | 6.35e-03 (1)  | 0.000000        | <a href="#">list csv</a> |
| 19            | 10.00      | ● | 1.00e+00 (18) | 4.28e-03 (2)  | 0.003105        | <a href="#">list csv</a> |
| * 10          | 10.00      | ● | 1.00e+00 (15) | 1.91e-03 (5)  | 0.029802        | <a href="#">list csv</a> |

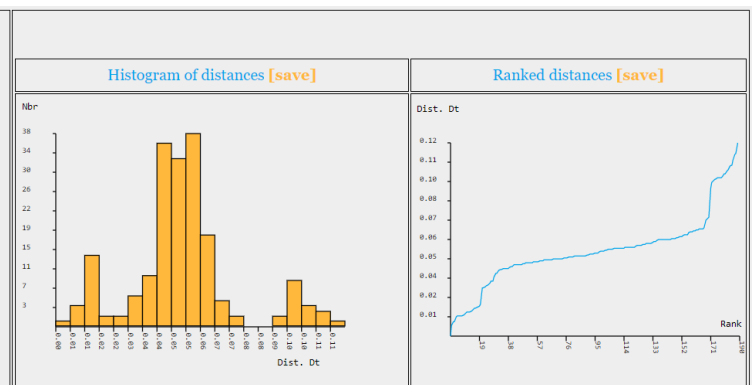

## 18S-28S-ITS-rpb1 concatenation ASAP analysis:

Partition 1

Asap-Score: 2.500000

P-value: 9.321357e-01

Threshold distance: 2.56%

Nb subsets with recursion:16 (without recursion: 15)

Subset[ 1 ] n: 2 ;id: *Exophiala viscosa* JF 03-3F *Exophiala viscosa* JF 03-4F

Subset[ 2 ] n: 1 ;id: *Exophiala sideris*

Subset[ 3 ] n: 1 ;id: *Exophiala bergeri*

Subset[ 4 ] n: 1 ;id: *Exophiala nigra*

Subset[ 5 ] n: 1 ;id: *Exophiala spinifera*

Subset[ 6 ] n: 2 ;id: *Exophiala aquamarina* *Exophiala pisciphila*

Subset[ 7 ] n: 1 ;id: *Exophiala salmonis*

Subset[ 8 ] n: 1 ;id: *Exophiala cancerae*

Subset[ 9 ] n: 1 ;id: *Exophiala castellanii*

Subset[ 10 ] n: 1 ;id: *Exophiala dermatitidis*

Subset[ 11 ] n: 1 ;id: *Exophiala jeanselmei*

Subset[ 12 ] n: 1 ;id: *Exophiala lecanii-corni*

Subset[ 13 ] n: 1 ;id: *Exophiala nishimurae*

Subset[ 14 ] n: 1 ;id: *Exophiala oligosperma*

Subset[ 15 ] n: 1 ;id: *Exophiala xenobiotica*

Subset[ 16 ] n: 1 ;id: *Endocarpon pusillum*

| Nb of subsets | asap-score | P-val (rank)  | W (rank)      | Threshold dist. | Text                     |
|---------------|------------|---------------|---------------|-----------------|--------------------------|
| * 16          | 2.50       | 9.32e-01 (2)  | 6.47e-03 (3)  | 0.025639        | <a href="#">list csv</a> |
| * 15          | 3.00       | 4.64e-02 (1)  | 2.19e-03 (5)  | 0.028228        | <a href="#">list csv</a> |
| * 14          | 3.50       | 9.40e-01 (3)  | 2.21e-03 (4)  | 0.031368        | <a href="#">list csv</a> |
| 2             | 6.50       | 9.62e-01 (6)  | 1.86e-03 (7)  | 0.110115        | <a href="#">list csv</a> |
| * 11          | 7.50       | 9.42e-01 (4)  | 1.03e-03 (11) | 0.040017        | <a href="#">list csv</a> |
| * 12          | 8.50       | 9.68e-01 (7)  | 1.08e-03 (10) | 0.038969        | <a href="#">list csv</a> |
| 18            | 9.00       | 1.00e+00 (17) | 2.36e-02 (1)  | 0.000000        | <a href="#">list csv</a> |
| * 17          | 9.00       | 1.00e+00 (16) | 1.32e-02 (2)  | 0.012071        | <a href="#">list csv</a> |
| 7             | 9.50       | 1.00e+00 (13) | 2.04e-03 (6)  | 0.051783        | <a href="#">list csv</a> |
| 4             | 10.50      | 9.56e-01 (5)  | 5.97e-04 (16) | 0.070077        | <a href="#">list csv</a> |

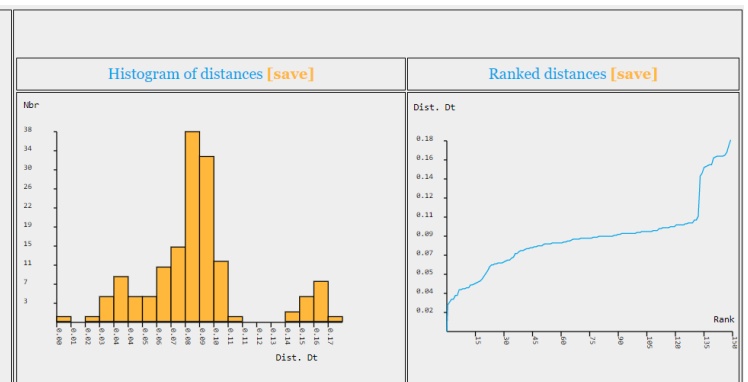

Supplement: Supplementary file 1 [file 2]
